# Supplementary material for: Recurrence Patterns and Risk Factors after Curative Resection for Colorectal Cancer: Insights for Postoperative Surveillance Strategies
Source: MDPI journal article supplement (doi:10.3390/cancers15245791), 2023-12-10
Supplement: s1 [file s1]

**Table S1** Clinical and tumor characteristics of colon cancer patients according to recurrence

|                                                       | Recurrence (n=141) | No Recurrence (n=1450) | <i>P</i> value |
|-------------------------------------------------------|--------------------|------------------------|----------------|
| Age, years (Mean $\pm$ SD)                            | 64.8 $\pm$ 13.0    | 64.2 $\pm$ 11.7        | 0.58           |
| Sex, n (%)                                            |                    |                        | 0.95           |
| Male                                                  | 81 (57.4)          | 837 (57.7)             |                |
| Female                                                | 60 (42.6)          | 613 (42.3)             |                |
| Body mass index, kg/m <sup>2</sup><br>(Mean $\pm$ SD) | 23.6 $\pm$ 3.0     | 23.8 $\pm$ 3.3         | 0.43           |
| ASA score, n (%)                                      |                    |                        | 0.77           |
| 1                                                     | 29 (20.6)          | 267 (18.4)             |                |
| 2                                                     | 96 (68.1)          | 1059 (73.0)            |                |
| 3                                                     | 14 (9.9)           | 116 (8.0)              |                |
| 4                                                     | 2 (1.4)            | 8 (0.6)                |                |
| Comorbidities, n (%)                                  |                    |                        |                |
| Endocrine                                             | 25 (17.7)          | 317 (21.9)             | 0.26           |
| Cardiovascular                                        | 69 (48.9)          | 695 (47.9)             | 0.82           |
| Respiratory                                           | 16 (11.3)          | 122 (8.4)              | 0.24           |
| Smoking, n (%)                                        | 46 (32.6)          | 421 (29.0)             | 0.39           |
| Alcohol, n (%)                                        | 65 (46.1)          | 577 (39.8)             | 0.15           |
| Tumor location, n (%)                                 |                    |                        | 0.096          |
| Ascending colon                                       | 44 (31.2)          | 366 (25.2)             |                |
| Transverse colon                                      | 23 (16.3)          | 238 (16.4)             |                |
| Descending colon                                      | 10 (7.1)           | 75 (5.2)               |                |
| Sigmoid colon                                         | 64 (45.4)          | 771 (53.2)             |                |
| CEA level $\geq$ 5 ng/mL, n (%)                       | 38 (27.0)          | 283 (19.5)             | 0.016          |
| Obstruction, n (%)                                    | 44 (31.2)          | 155 (10.7)             | <0.001         |
| Perforation, n (%)                                    | 5 (3.5)            | 43 (3.0)               | 0.72           |
| Endoscopic stent<br>insertion, n (%)                  | 20 (14.2)          | 63 (4.3)               | <0.001         |
| Adjuvant chemotherapy,<br>n (%)                       | 93 (66.0)          | 677 (46.7)             | <0.001         |

ASA, American Society of Anesthesiologists physical status classification system; CEA, Carcinoembryonic antigen; SD, Standard deviation

**Table S2** Surgical and pathological characteristics of colon cancer patients according to recurrence

|                                   | Recurrence (n=141) | No Recurrence (n=1450) | <i>P</i> value |
|-----------------------------------|--------------------|------------------------|----------------|
| Emergency operation, n (%)        | 8 (5.7)            | 35 (2.4)               | 0.046          |
| Open conversion, n (%)            | 21 (14.9)          | 77 (5.3)               | 0.002          |
| R2 resection, n (%)               | 2 (1.4)            | 4 (0.3)                | 0.087          |
| Estimated blood loss $\geq$ 800ml | 8 (5.7)            | 22 (1.5)               | <0.001         |
| Operation time $\geq$ 240 min     | 30 (21.3)          | 194 (13.4)             | <0.001         |
| Transfusion, n (%)                | 17 (12.1)          | 77 (5.3)               | <0.001         |
| Anastomotic leakage, n (%)        | 3 (2.1)            |                        | 0.002          |
| Pathologic T stage, n (%)         |                    |                        | <0.001         |
| T1                                | 2 (1.4)            | 232 (16.0)             |                |
| T2                                | 7 (5.0)            | 205 (14.1)             |                |
| T3                                | 100 (70.9)         | 908 (62.6)             |                |
| T4                                | 32 (22.7)          | 105 (7.2)              |                |
| Pathologic N stage, n (%)         |                    |                        | <0.001         |
| N0                                | 56 (39.7)          | 943 (65.0)             |                |
| N1                                | 53 (37.6)          | 389 (26.8)             |                |
| N2                                | 32 (22.7)          | 118 (8.1)              |                |
| TNM Stage, n (%)                  |                    |                        | <0.001         |
| I                                 | 5 (3.5)            | 361 (24.9)             |                |
| II                                | 51 (36.2)          | 582 (40.1)             |                |
| III                               | 85 (60.3)          | 507 (35.0)             |                |
| Harvested LN < 12, n (%)          | 8 (5.7)            | 138 (9.5)              | 0.17           |
| Differentiation, n (%)            |                    |                        | 0.095          |
| Well differentiated               | 28 (19.9)          | 274 (18.9)             |                |
| Moderate differentiated           | 97 (68.8)          | 1071 (73.9)            |                |
| Poorly differentiated             | 7 (5.0)            | 38 (2.6)               |                |

|                            |           |            |        |
|----------------------------|-----------|------------|--------|
| Mucinous                   | 7 (5.0)   | 63 (4.3)   |        |
| Signet ring cell           | 2 (1.4)   | 1 (0.1)    |        |
| Etc.                       | 0         | 3 (0.2)    |        |
| Lymphatic invasion, n (%)  | 41 (29.1) | 234 (16.1) | 0.06   |
| Vascular invasion, n (%)   | 18 (12.8) | 37 (2.6)   | 0.039  |
| Perineural invasion, n (%) | 16 (11.3) | 43 (3.0)   | <0.001 |
| DRM involvement, n (%)     | 0         | 1 (0.1)    | 0.017  |
| CRM involvement, n (%)     | 1 (0.7)   | 14 (1.0)   | 0.039  |

LN, Lymph node; DRM, Distal resection margin; CRM, Circumferential resection margin

**Table S3** Clinical and tumor characteristics of rectal cancer patients according to recurrence

|                                                   | Recurrence (n=150) | No Recurrence (n=881) | <i>P</i> value |
|---------------------------------------------------|--------------------|-----------------------|----------------|
| Age, years (Mean ± SD)                            | 61 ± 12.6          | 61.6 ± 12.0           | 0.63           |
| Sex, n (%)                                        |                    |                       | 0.033          |
| Male                                              | 103 (68.7)         | 576 (65.4)            |                |
| Female                                            | 47 (31.3)          | 305 (34.6)            |                |
| Body mass index, kg/m <sup>2</sup><br>(Mean ± SD) | 23.4 ± 3.5         | 23.6 ± 3.1            |                |
| ASA score, n (%)                                  |                    |                       |                |
| 1                                                 | 41 (27.3)          | 199 (22.6)            |                |
| 2                                                 | 99 (66.0)          | 634 (72.0)            |                |
| 3                                                 | 10 (6.7)           | 48 (5.4)              |                |
| 4                                                 | 0                  | 0                     |                |
| Comorbidities, n (%)                              |                    |                       |                |
| Endocrine                                         | 36 (24.0)          | 169 (19.2)            | 0.17           |
| Cardiovascular                                    | 61 (40.7)          | 358 (40.6)            | 0.99           |
| Respiratory                                       | 11 (7.3)           | 64 (7.3)              | 0.98           |
| Smoking, n (%)                                    | 54 (36.0)          | 314 (35.6)            | 0.93           |
| Alcohol, n (%)                                    | 55 (36.7)          | 364 (41.3)            | 0.28           |
| Tumor location, n (%)                             |                    |                       | 0.082          |
| Upper rectum                                      | 15 (10.0)          | 136 (15.4)            |                |

|                                   |            |            |        |
|-----------------------------------|------------|------------|--------|
| Mid/Low rectum                    | 135 (90.0) | 745 (84.6) |        |
| CEA level $\geq 5$ ng/mL, n (%)   | 38 (25.3)  | 151 (17.1) | 0.023  |
| Obstruction, n (%)                | 6 (4.0)    | 26 (3.0)   | 0.54   |
| Perforation, n (%)                | 3 (2.0)    | 4 (0.5)    | 0.033  |
| Endoscopic stent insertion, n (%) | 4 (2.7)    | 9 (1.0)    | 0.095  |
| Neoadjuvant Therapy, n (%)        | 66 (44.0)  | 245 (27.8) | <0.001 |
| SCRT                              | 9 (6.0)    | 40 (4.5)   |        |
| LCRT                              | 57 (38.0)  | 205 (23.3) |        |
| Adjuvant chemotherapy, n (%)      | 105 (70.0) | 441 (50.1) | <0.001 |
| Postoperative radiotherapy, n (%) | 5 (3.3)    | 26 (3.0)   | 0.81   |

ASA, American Society of Anesthesiologists physical status classification system; CEA, Carcinoembryonic antigen; SD, Standard deviation; SCRT, Short-course radiotherapy; LCRT, Long-course radiotherapy

**Table S4** Surgical and pathological characteristics of rectal cancer patients according to recurrence

|                                     | Recurrence (n=150) | No Recurrence (n=881) | <i>P</i> value |
|-------------------------------------|--------------------|-----------------------|----------------|
| Emergency operation, n (%)          | 1 (0.7)            | 0                     | 0.015          |
| Open conversion, n (%)              | 2 (1.3)            | 15 (1.7)              | 0.72           |
| R2 resection, n (%)                 | 1 (0.7)            | 4 (0.5)               | 0.76           |
| Estimated blood loss $\geq 800$ ml  | 7 (4.7)            | 13 (1.5)              | 0.009          |
| Operation time $\geq 240$ min       | 94 (62.7)          | 403 (45.7)            | <0.001         |
| Transfusion, n (%)                  | 18 (12.0)          | 44 (5.0)              | 0.001          |
| IMA high ligation, n (%)            | 125 (83.4)         | 707 (80.3)            | 0.63           |
| Lateral pelvic LN dissection, n (%) | 7 (4.7)            | 26 (3.0)              | 0.27           |
| Anastomotic leakage, n (%)          | 26 (17.3)          | 79 (9.0)              | 0.002          |
| Pathologic T stage, n (%)           |                    |                       | <0.001         |

|                                     |            |            |        |
|-------------------------------------|------------|------------|--------|
| T0                                  | 2 (1.3)    | 22 (2.5)   |        |
| T1                                  | 4 (2.7)    | 125 (14.2) |        |
| T2                                  | 23 (15.3)  | 230 (26.1) |        |
| T3                                  | 104 (69.3) | 488 (55.4) |        |
| T4                                  | 17 (11.3)  | 16 (1.8)   |        |
| Pathologic N stage, n (%)           |            |            | <0.001 |
| N0                                  | 64 (42.7)  | 593 (67.3) |        |
| N1                                  | 47 (31.3)  | 207 (23.5) |        |
| N2                                  | 39 (26.0)  | 81 (9.2)   |        |
| Lateral pelvic LN metastasis, n (%) | 0          | 4 (0.5)    | 0.045  |
| TNM Stage, n (%)                    |            |            | <0.001 |
| 0                                   | 2 (1.3)    | 18 (2.0)   |        |
| I                                   | 19 (12.7)  | 288 (32.7) |        |
| II                                  | 43 (28.7)  | 287 (32.6) |        |
| III                                 | 86 (57.3)  | 288 (32.7) |        |
| Harvested LN < 12, n (%)            | 34 (22.7)  | 134 (15.2) | 0.022  |
| Differentiation, n (%)              |            |            | 0.35   |
| Well differentiated                 | 35 (23.3)  | 159 (18.0) |        |
| Moderate differentiated             | 105 (70.0) | 679 (77.1) |        |
| Poorly differentiated               | 6 (4.0)    | 10 (1.1)   |        |
| Mucinous                            | 4 (2.7)    | 30 (3.4)   |        |
| Signet ring cell                    | 0          | 2 (0.2)    |        |
| Etc.                                | 0          | 1 (0.1)    |        |
| Lymphatic invasion, n (%)           | 23 (15.3)  | 114 (12.9) | 0.92   |
| Vascular invasion, n (%)            | 9 (6.0)    | 30 (3.4)   | 0.95   |
| Perineural invasion, n (%)          | 19 (12.7)  | 35 (4.0)   | 0.005  |
| DRM involvement, n (%)              | 3 (2.0)    | 4 (0.5)    | 0.033  |
| CRM involvement, n (%)              | 8 (5.3)    | 20 (2.3)   | 0.033  |

---

IMA, Inferior mesenteric artery; LN, Lymph node; DRM, Distal resection margin; CRM, Circumferential resection margin

**Table S5** The distribution of neoadjuvant and adjuvant therapies according to stages of colon and rectal cancer patients

|                  | <sup>a</sup> Neoadjuvant treatment |                | Adjuvant chemotherapy |                |
|------------------|------------------------------------|----------------|-----------------------|----------------|
|                  | Colon cancer                       | Rectal cancer  | Colon cancer          | Rectal cancer  |
| Stage 0, n (%)   |                                    |                |                       | 2/20 (10.0)    |
| Stage I, n (%)   | 0/395                              | 16/174 (9.2)   | 11/366 (3.0)          | 14/307 (4.6)   |
| Stage II, n (%)  | 0/432                              | 23/95 (24.2)   | 255/366 (69.7)        | 209/330 (63.3) |
| Stage III, n (%) | 9/764 (1.2)                        | 272/762 (35.7) | 504/592 (85.1)        | 321/374 (85.8) |

<sup>a</sup> The stage for neoadjuvant treatment is the clinical stage.

**Table S6** Univariate and Multivariate analyses of risk factors associated with recurrence in colon cancer patients (N=1591)

| Variables                         | Univariate analysis     |                  | Multivariate analysis   |                  |
|-----------------------------------|-------------------------|------------------|-------------------------|------------------|
|                                   | HR (95% CI)             | P                | HR (95% CI)             | P                |
| <b>Patient Factor</b>             |                         |                  |                         |                  |
| Age                               | 1.01 (0.99-1.02)        | 0.37             |                         |                  |
| Sex (F)                           | 0.99 (0.72-1.39)        | 0.99             |                         |                  |
| BMI                               | 0.97 (0.93-1.03)        | 0.32             |                         |                  |
| ASA status (1/2 vs. 3/4)          | 1.46 (0.87-2.45)        | 0.16             |                         |                  |
| <b>Comorbidities</b>              |                         |                  |                         |                  |
| Endocrine                         | 0.78 (0.51-1.20)        | 0.26             |                         |                  |
| Cardiovascular                    | 1.05 (0.76-1.46)        | 0.77             |                         |                  |
| Respiratory                       | 1.42 (0.84-2.38)        | 0.19             |                         |                  |
| Alcohol                           | 1.20 (0.85-1.71)        | 0.30             |                         |                  |
| Smoking                           | 1.27 (0.91-1.77)        | 0.16             |                         |                  |
| <b>Clinical factor</b>            |                         |                  |                         |                  |
| <b>Obstruction</b>                | <b>3.50 (2.45-5.00)</b> | <b>&lt;0.001</b> | <b>2.57 (1.53-4.31)</b> | <b>&lt;0.001</b> |
| Perforation                       | 1.28 (0.53-3.14)        | 0.58             |                         |                  |
| CEA $\geq$ 5                      | 1.63 (1.11-2.38)        | 0.013            | 1.02 (0.68-1.55)        | 0.94             |
| <b>Surgical factor</b>            |                         |                  |                         |                  |
| Emergency operation               | 2.48 (1.22-5.06)        | 0.013            | 0.73 (0.25-2.12)        | 0.57             |
| Open conversion                   | 3.03 (1.90-4.81)        | <0.001           | 1.41 (0.57-3.48)        | 0.45             |
| Estimated blood loss $\geq$ 800ml | 3.70 (1.81-7.56)        | <0.001           | 1.13 (0.42-3.04)        | 0.81             |
| Operation time $\geq$ 240 min     | 1.69 (1.13-2.53)        | 0.011            | 1.37 (0.86-2.17)        | 0.18             |
| Transfusion                       | 2.39 (1.44-3.97)        | 0.001            | 1.77 (0.90-3.49)        | 0.10             |
| Anastomosis leakage               | 0.77 (0.24-2.40)        | 0.65             |                         |                  |
| LN < 12                           | 0.58 (0.28-1.18)        | 0.13             |                         |                  |
| <b>Tumor factor</b>               |                         |                  |                         |                  |
| Location (Rt vs. Lt)              | 0.80 (0.58-1.12)        | 0.19             |                         |                  |

|                                              |                          |                  |                         |                  |
|----------------------------------------------|--------------------------|------------------|-------------------------|------------------|
| TNM stage                                    |                          |                  |                         |                  |
| <b>T1/T2 vs. pT3/T4</b>                      | <b>5.89 (3.00-11.58)</b> | <b>&lt;0.001</b> | <b>3.42 (1.61-7.26)</b> | <b>0.001</b>     |
| <b>N0 vs N1/N2</b>                           | <b>2.69 (1.92-3.77)</b>  | <b>&lt;0.001</b> | <b>2.45 (1.58-3.80)</b> | <b>&lt;0.001</b> |
| Differentiation<br>(WD/MD vs.<br>PD/MUC/SRC) | 1.60 (0.95-2.69)         | 0.076            |                         |                  |
| <b>Vascular<br/>invasion</b>                 | <b>4.71 (2.87-7.72)</b>  | <b>&lt;0.001</b> | <b>3.07 (1.65-5.70)</b> | <b>&lt;0.001</b> |
| Lymphatic<br>invasion                        | 2.10 (1.46-3.02)         | <0.001           | 1.09 (0.70-1.69)        | 0.69             |
| Perineural<br>invasion                       | 3.98 (2.36-6.70)         | <0.001           | 1.47 (0.76-2.82)        | 0.25             |
| DRM                                          |                          | 0.84             |                         |                  |
| CRM                                          | 0.84 (0.12-5.99)         | 0.86             |                         |                  |
| <b>Treatment factor</b>                      |                          |                  |                         |                  |
| Stent insertion                              | 3.31 (2.06-5.31)         | <0.001           | 0.72 (0.26-1.96)        | 0.51             |
| Adjuvant<br>chemotherapy                     | 1.94 (1.37-2.74)         | <0.001           | 0.67 (0.43-1.06)        | 0.085            |

**Table S7** Univariate and Multivariate analyses of risk factors associated with recurrence in rectal cancer patients (N=1031)

| Variables                      | Univariate analysis             |              | Multivariate analysis           |                  |
|--------------------------------|---------------------------------|--------------|---------------------------------|------------------|
|                                | HR (95% CI)                     | P            | HR (95% CI)                     | P                |
| <b>Patient Factor</b>          |                                 |              |                                 |                  |
| Age                            | 0.999 (0.98-1.01)               | 0.84         |                                 |                  |
| Sex (M)                        | 1.15 (0.82-1.63)                | 0.42         |                                 |                  |
| BMI                            | 0.97 (0.92-1.02)                | 0.28         |                                 |                  |
| ASA status (1/2<br>vs. 3/4)    | 1.37 (0.72-2.61)                | 0.34         |                                 |                  |
| <b>Comorbidities</b>           |                                 |              |                                 |                  |
| Endocrine                      | 1.36 (0.93-1.97)                | 0.11         |                                 |                  |
| Cardiovascular                 | 1.03 (0.74-1.42)                | 0.88         |                                 |                  |
| Respiratory                    | 1.06 (0.57-1.95)                | 0.86         |                                 |                  |
| Alcohol                        | 0.83 (0.60-1.16)                | 0.28         |                                 |                  |
| Smoking                        | 1.02 (0.73-1.43)                | 0.90         |                                 |                  |
| <b>Clinical factor</b>         |                                 |              |                                 |                  |
| Obstruction                    | 1.50 (0.66-3.40)                | 0.33         |                                 |                  |
| <b>Perforation</b>             | <b>3.67 (1.17-11.52)</b>        | <b>0.026</b> | <b>4.38 (1.34-14.34)</b>        | <b>0.015</b>     |
| CEA≥5                          | 1.68 (1.16-2.44)                | 0.006        | 1.30 (0.88-1.91)                | 0.19             |
| <b>Surgical factor</b>         |                                 |              |                                 |                  |
| <b>Emergency<br/>operation</b> | <b>30.85 (4.22-<br/>225.77)</b> | <b>0.001</b> | <b>43.95 (5.70-<br/>338.96)</b> | <b>&lt;0.001</b> |
| Open conversion                | 0.82 (0.20-3.29)                | 0.77         |                                 |                  |
| IMA high vs. low<br>ligation   | 1.07 (0.46-2.47)                | 0.88         |                                 |                  |
| LPLND                          | 0.75 (0.82-3.75)                | 0.15         |                                 |                  |
| <b>Estimated blood</b>         | <b>3.27 (153-6.98)</b>          | <b>0.002</b> | <b>2.76 (1.17-6.54)</b>         | <b>0.021</b>     |

|                                        |                          |                  |                          |                  |
|----------------------------------------|--------------------------|------------------|--------------------------|------------------|
| <b>loss ≥ 800ml</b>                    |                          |                  |                          |                  |
| Operation time ≥ 240 min               | 1.85 (1.33-2.58)         | <0.001           | 1.67 (0.95-1.96)         | 0.09             |
| Transfusion                            | 2.37 (1.45-3.89)         | 0.001            | 1.51 (0.86-2.64)         | 0.15             |
| <b>Anastomosis leakage</b>             | <b>2.14 (1.40-3.27)</b>  | <b>&lt;0.001</b> | <b>2.01 (1.29-3.12)</b>  | <b>0.002</b>     |
| <b>LN &lt; 12</b>                      | <b>1.50 (1.02-2.20)</b>  | <b>0.038</b>     | <b>1.69 (1.12-2.54)</b>  | <b>0.013</b>     |
| <b>Tumor factor</b>                    |                          |                  |                          |                  |
| Location (UR vs. MR/LR)                | 1.55 (0.91-2.64)         | 0.11             |                          |                  |
| TNM stage                              |                          |                  |                          |                  |
| <b>T1/T2 vs. pT3/T4</b>                | <b>2.98 (1.98-4.46)</b>  | <b>&lt;0.001</b> | <b>2.19 (1.35-3.55)</b>  | <b>0.001</b>     |
| <b>N0 vs N1/N2</b>                     | <b>2.67 (1.93-3.68)</b>  | <b>&lt;0.001</b> | <b>2.53 (1.69-3.79)</b>  | <b>&lt;0.001</b> |
| LPLN metastasis                        | 0.05 (0.00-1838.36)      | 0.58             |                          |                  |
| Differentiation (WD/MD vs. PD/MUC/SRC) | 1.48 (0.78-2.81)         | 0.23             |                          |                  |
| Vascular invasion                      | 2.15 (1.09-4.21)         | 0.026            | 0.94 (0.42-2.11)         | 0.88             |
| Lymphatic invasion                     | 1.24 (0.80-1.94)         | 0.34             |                          |                  |
| Perineural invasion                    | 3.38 (2.09-5.48)         | <0.001           | 1.75 (0.99-3.08)         | 0.055            |
| <b>DRM</b>                             | <b>5.36 (1.70-16.83)</b> | <b>0.004</b>     | <b>4.15 (1.17-14.79)</b> | <b>0.028</b>     |
| <b>CRM</b>                             | <b>2.44 (1.20-4.97)</b>  | <b>0.014</b>     | <b>2.18 (1.04-4.54)</b>  | <b>0.038</b>     |
| <b>Treatment factor</b>                |                          |                  |                          |                  |
| <b>Stent insertion</b>                 | <b>2.77 (1.03-7.49)</b>  | <b>0.044</b>     | <b>2.90 (1.05-8.01)</b>  | <b>0.041</b>     |
| <b>Neoadjuvant Tx</b>                  | <b>1.96 (1.42-2.71)</b>  | <b>&lt;0.001</b> | <b>1.70 (1.18-2.44)</b>  | <b>0.005</b>     |
| SCRT                                   | 1.89 (0.95-3.76)         | 0.071            |                          |                  |
| LCRT                                   | 2.03 (1.44-2.84)         | <0.001           |                          |                  |
| Adjuvant chemotherapy                  | 1.97 (1.39-2.80)         | <0.001           | 0.76 (0.49-1.20)         | 0.25             |
| Postoperative RT                       | 1.11 (0.46-2.72)         | 0.81             |                          |                  |

CEA, Carcinoembryonic antigen; LN, Lymph node; DRM, Distal resection margin; CRM, Circumferential resection margin.
